# Supplementary material for: Genome-wide Association Study (GWAS) of mesocotyl elongation based on re-sequencing approach in rice
Source: BMC Plant Biol. 2015 Sep 11;15:218. doi: 10.1186/s12870-015-0608-0 (PMC4566844; doi:10.1186/s12870-015-0608-0)
Supplement: Additional file 5: Table S4. — Annotation of candidate genes anchored by associated SNPs. (XLSX 34 kb) [file 12870_2015_608_MOESM5_ESM.xlsx]

## Sheet: Sheet1
Table S4 Annotation of candidate genes anchored by the SNPs associated to mesocotyl elongation in rice
Traits	SNP No	Chr.	Position	P value	FDR adjusted P value	SNP location & type	Rice gene loci	Annotated gene function
MLw	104194088	1	4194088	2.94e-08	0.000496058	intergenic
MLw	104202117	1	4202117	7.29e-08	0.000891315	intergenic
MLw	115171933	1	15171933	7.76e-08	0.000897547	gene_promotor	LOC_Os01g27219	hypothetical protein
MLw	115354359	1	15354359	6.13e-08	0.000828842	intergenic
MLw	118058531	1	18058531	2.11e-08	0.000404351	intergenic
MLw	118079287	1	18079287	2.16e-09	9.33e-05	gene_promotor	LOC_Os01g32940	hypothetical protein
MLw	118079811	1	18079811	4.42e-08	0.000666974	gene_promotor	LOC_Os01g32940	hypothetical protein
MLw	119931306	1	19931306	1.26e-08	0.000292209	gene_promotor	LOC_Os01g36020	retrotransposon protein putative unclassified
MLw	125296113	1	25296113	8.62e-08	0.00092425	intron	LOC_Os01g44130	aspartic proteinase oryzasin-1 precursor putative expressed
MLw	129265318	1	29265318	8.04e-08	0.000899123	intergenic
MLw	129265667	1	29265667	2.71e-08	0.000464612	intergenic
MLw	129267973	1	29267973	2.02e-08	0.000401655	intergenic
MLw	129272410	1	29272410	2.64e-08	0.000464612	intergenic
MLw	129283690	1	29283690	2.1e-08	0.000404351	gene_promotor	LOC_Os01g50970	expressed protein
MLw	129288539	1	29288539	6.42e-09	0.000159726	gene_promotor	LOC_Os01g50980	cullin putative expressed
MLw	129295029	1	29295029	4.51e-09	0.000131896	intergenic
MLw	129296034	1	29296034	4.51e-09	0.000131896	gene_promotor	LOC_Os01g50990	FBD domain containing protein putative expressed
MLw	129297344	1	29297344	4.51e-09	0.000131896	CDS_nonsynonymous	LOC_Os01g50990	FBD domain containing protein putative expressed
MLw	129304267	1	29304267	4.51e-09	0.000131896	intergenic
MLw	141373709	1	41373709	2.57e-09	0.000102234	gene_promotor	LOC_Os01g71410	glycosyl hydrolases family 17 putative expressed
MLw	303038118	3	3038118	7.39e-08	0.000891315	gene_promotor	LOC_Os03g06070	la domain containing protein putative expressed
MLw	303085463	3	3085463	5.99e-09	0.00015272	gene_promotor	LOC_Os03g06139	ABC-2 type transporter domain containing protein expressed
MLw	310440350	3	10440350	1.86e-08	0.00037791	intergenic
MLw	315010911	3	15010911	6.29e-10	3.48e-05	intergenic
MLw	315682836	3	15682836	4.15e-12	4.13e-06	intergenic
MLw	322105576	3	22105576	7.86e-08	0.000898795	intergenic
MLw	322137477	3	22137477	3.58e-08	0.000553369	gene_promotor	LOC_Os03g39790	retrotransposon protein putative unclassified expressed
MLw	322243685	3	22243685	8.92e-08	0.00092425	gene_promotor	LOC_Os03g40040	expressed protein
MLw	322267345	3	22267345	8.92e-08	0.00092425	CDS_synonymous	LOC_Os03g40084	hypothetical protein
MLw	322290584	3	22290584	5.05e-11	7.17e-06	CDS_nonsynonymous	LOC_Os03g40110	nop14-like family protein expressed
MLw	322293625	3	22293625	8.92e-08	0.00092425	intergenic
MLw	322293690	3	22293690	7.67e-08	0.000897547	intergenic
MLw	322304180	3	22304180	1.26e-10	1.05e-05	intergenic
MLw	322338359	3	22338359	8.58e-10	4.27e-05	intergenic
MLw	322350576	3	22350576	9.04e-08	0.000926917	gene_promotor	LOC_Os03g40194	disease resistance RPP13-like protein 1 putative expressed
MLw	322403064	3	22403064	1.83e-08	0.00037791	intergenic
MLw	322440834	3	22440834	3.57e-08	0.000553369	gene_promotor	LOC_Os03g40390	expressed protein
MLw	322440893	3	22440893	1.26e-08	0.000292209	gene_promotor	LOC_Os03g40390	expressed protein
MLw	322486268	3	22486268	8.9e-11	1.04e-05	intergenic
MLw	322491183	3	22491183	7.89e-10	4.13e-05	intergenic
MLw	322528344	3	22528344	4.56e-08	0.000677683	intergenic
MLw	322529454	3	22529454	4.17e-09	0.000131896	intergenic
MLw	408882543	4	8882543	4.21e-10	2.8e-05	intron	LOC_Os04g16350	retrotransposon protein putative unclassified
MLw	409772335	4	9772335	1.65e-11	4.23e-06	intron	LOC_Os04g17840	retrotransposon protein putative unclassified
MLw	411090633	4	11090633	4.84e-08	0.000708467	intron	LOC_Os04g19900	retrotransposon protein putative Ty3-gypsy subclass
MLw	413659408	4	13659408	3.89e-09	0.000131896	intergenic
MLw	430137498	4	30137498	2.71e-08	0.000464612	gene_promotor	LOC_Os04g51190	growth-regulating factor putative expressed
MLw	430240597	4	30240597	3.29e-08	0.000527985	intergenic
MLw	430248474	4	30248474	6.16e-08	0.000828842	intron	LOC_Os04g51390	aldose 1-epimerase putative expressed
MLw	430269102	4	30269102	5.44e-08	0.000767342	intergenic
MLw	430384178	4	30384178	6.73e-08	0.000880275	gene_promotor	LOC_Os04g51600	expressed protein
MLw	435220819	4	35220819	8.32e-08	0.000920281	intergenic
MLw	515116638	5	15116638	8.69e-08	0.00092425	intergenic
MLw	515845966	5	15845966	7.49e-08	0.000891315	intergenic
MLw	516046238	5	16046238	7.21e-08	0.000891315	gene_promotor	LOC_Os05g27650	transposon protein putative ACTA En/Spm sub-class
MLw	516086208	5	16086208	2.97e-09	0.000109469	intron	LOC_Os05g27720	transposon protein putativeACTA En FSpm sub-class
MLw	516087024	5	16087024	5.88e-09	0.00015272	intron	LOC_Os05g27720	transposon protein putativeACTA En FSpm sub-class
MLw	516101427	5	16101427	1.08e-08	0.000263295	intron	LOC_Os05g27740	hypothetical protein
MLw	516127316	5	16127316	6.97e-08	0.000880275	intron	LOC_Os05g27790	membrane associated DUF588 domain containing protein putative expressed
MLw	516128832	5	16128832	1.03e-10	1.04e-05	intron	LOC_Os05g27790	membrane associated DUF588 domain containing protein putative expressed
MLw	516135265	5	16135265	8.04e-08	0.000899123	intergenic
MLw	516168404	5	16168404	2.93e-10	2.08e-05	intergenic
MLw	516209696	5	16209696	3.28e-08	0.000527985	intergenic
MLw	516324498	5	16324498	4.7e-10	2.83e-05	intergenic
MLw	516365330	5	16365330	6.97e-08	0.000880275	CDS_synonymous	LOC_Os05g28090	expressed protein
MLw	522192885	5	22192885	6.99e-08	0.000880275	intergenic
MLw	523137759	5	23137759	1.67e-08	0.000367167	intron	LOC_Os05g39530	ribonuclease P family protein putative expressed
MLw	523138240	5	23138240	2.13e-11	4.23e-06	intron	LOC_Os05g39530	ribonuclease P family protein putative expressed
MLw	523138248	5	23138248	2.13e-11	4.23e-06	intron	LOC_Os05g39530	ribonuclease P family protein putative expressed
MLw	615693545	6	15693545	2.34e-09	9.72e-05	intergenic
MLw	624662772	6	24662772	5.02e-09	0.000142706	intergenic
MLw	626309880	6	26309880	1.49e-09	6.74e-05	intron	LOC_Os06g43690	WD repeat-containing protein putative expressed
MLw	626508017	6	26508017	1.87e-11	4.23e-06	intergenic
MLw	626581764	6	26581764	2.54e-10	1.95e-05	CDS_nonsynonymous	LOC_Os06g44070	retrotransposon protein putative unclassified
MLw	626583018	6	26583018	2.19e-08	0.000411178	intergenic
MLw	626583605	6	26583605	2.69e-08	0.000464612	gene_promotor	LOC_Os06g44080	ubiquitin family protein putative expressed
MLw	626584500	6	26584500	3.61e-08	0.000553369	gene_promotor	LOC_Os06g44080	ubiquitin family protein putative expressed
MLw	626588441	6	26588441	1.16e-10	1.04e-05	intergenic
MLw	826013936	8	26013936	5.47e-08	0.000767342	gene_promotor	LOC_Os08g41180	MBTB31-Bric-a-Brac Tramtrack Broad Complex BTB domain with Meprin and TRAF Homology MATH domain expressed
MLw	900720828	9	720828	5.72e-09	0.00015272	intergenic
MLw	900822793	9	822793	1.43e-09	6.74e-05	intergenic
MLw	900834502	9	834502	8.89e-08	0.00092425	intergenic
MLw	906277978	9	6277978	1.7e-08	0.000367167	intergenic
MLw	906278538	9	6278538	4.22e-09	0.000131896	intergenic
MLw	906279395	9	6279395	1.14e-10	1.04e-05	intergenic
MLw	906323140	9	6323140	5.99e-08	0.000828215	intergenic
MLw	906323355	9	6323355	6.53e-08	0.000865854	intergenic
MLw	906325676	9	6325676	3.47e-11	5.75e-06	gene_promotor	LOC_Os09g11380	conserved hypothetical protein
MLw	906326601	9	6326601	3.1e-08	0.000514027	CDS_synonymous	LOC_Os09g11380	conserved hypothetical protein
MLw	906326783	9	6326783	4.84e-10	2.83e-05	intron	LOC_Os09g11380	conserved hypothetical protein
MLw	906326866	9	6326866	5.32e-09	0.000147136	intron	LOC_Os09g11380	conserved hypothetical protein
MLw	906759629	9	6759629	2.96e-09	0.000109469	gene_promotor	LOC_Os09g12000	hypothetical protein
MLw	915099731	9	15099731	1.45e-08	0.000326856	intergenic
MLw	916588485	9	16588485	1.84e-08	0.00037791	gene_promotor	LOC_Os09g27280	hypothetical protein
MLw	1016259717	10	16259717	4.99e-08	0.00071982	intergenic
MLw	1021052914	10	21052914	7.52e-08	0.000891315	intergenic
MLw	1102659922	11	2659922	9.38e-08	0.00095181	intergenic
MLw	1104035139	11	4035139	9.6e-08	0.00095181	intergenic
MLw	1128233910	11	28233910	2.56e-08	0.000464612	five_prime_UTR	LOC_Os11g47590	glycosyl hydrolase putative expressed
MLs	315682836	3	15682836	3.20849e-08	0.00638548	intergenic
MLs	322403064	3	22403064	2.16093e-08	0.00537581	intergenic
MLs	322440834	3	22440834	5.9841e-08	0.00819227	gene_promotor	LOC_Os03g40390	expressed protein
MLs	322440893	3	22440893	3.72537e-09	0.0012357	gene_promotor	LOC_Os03g40390	expressed protein
MLs	322486268	3	22486268	4.18871e-08	0.00694693	intergenic
MLs	626508017	6	26508017	7.11656e-10	0.000708164	intergenic
MLs	1010502493	10	10502493	2.30002e-09	0.00114437	intron	LOC_Os10g20860	protease inhibitor/seed storage/LTP family putative

## Sheet: Sheet2
1	SNP	Chromosome	Position	P.value	maf	nobs	Rsquare.of.Model.without.SNP	Rsquare.of.Model.with.SNP	FDR_Adjusted_P-values
34	129297344	1	29297344	4.51e-09	0.0701754	228	0.243858	0.369098	0.000131896	MLw	129297344	1	29297344	CDS	LOC_Os01g50990	FBD domain containing protein putative expressed	LOC_Os01g50990.1	29296996	29297712	+	0	A	A	AGC	S	T	TGC	C	code_mutation
8	322290584	3	22290584	5.05e-11	0.394737	228	0.243858	0.404228	7.17e-06	MLw	322290584	3	22290584	CDS	LOC_Os03g40110	nop14-like family protein expressed	LOC_Os03g40110.1	22290556	22290690	-	0	T	T	GTT	V	C	GCT	A	code_mutation
14	626581764	6	26581764	2.54e-10	0.0899123	228	0.243858	0.391402	1.95e-05	MLw	626581764	6	26581764	CDS	LOC_Os06g44070	retrotransposon protein putative unclassified	LOC_Os06g44070.1	26581647	26581989	+	0	G	G	GCT	A	A	ACT	T	code_mutation
55	1128233910	11	28233910	2.56e-08	0.0745614	228	0.243858	0.355919	0.000464612	MLw	1128233910	11	28233910	five_prime_UTR	LOC_Os11g47590	glycosyl hydrolase putative expressed	LOC_Os11g47590.1	28233856	28233939	-	.
87	115171933	1	15171933	7.76e-08	0.0745614	228	0.243858	0.347654	0.000897547	MLw	115171933	1	15171933	gene_promotor	LOC_Os01g27219	hypothetical protein		15172640	15172785	+	.
24	118079287	1	18079287	2.16e-09	0.0614035	228	0.243858	0.374755	9.33e-05	MLw	118079287	1	18079287	gene_promotor	LOC_Os01g32940	hypothetical protein		18078382	18079254	-	.
67	118079811	1	18079811	4.42e-08	0.29386	228	0.243858	0.351836	0.000666974	MLw	118079811	1	18079811	gene_promotor	LOC_Os01g32940	hypothetical protein		18078382	18079254	-	.
43	119931306	1	19931306	1.26e-08	0.0526316	228	0.243858	0.361297	0.000292209	MLw	119931306	1	19931306	gene_promotor	LOC_Os01g36020	retrotransposon protein putative unclassified		19927998	19930904	-	.
52	129283690	1	29283690	2.1e-08	0.0833333	228	0.243858	0.35743	0.000404351	MLw	129283690	1	29283690	gene_promotor	LOC_Os01g50970	expressed protein		29284327	29287673	+	.
41	129288539	1	29288539	6.42e-09	0.0833333	228	0.243858	0.366397	0.000159726	MLw	129288539	1	29288539	gene_promotor	LOC_Os01g50980	cullin putative expressed		29289281	29294397	+	.
33	129296034	1	29296034	4.51e-09	0.0701754	228	0.243858	0.369098	0.000131896	MLw	129296034	1	29296034	gene_promotor	LOC_Os01g50990	FBD domainontaining protein putative expressed		29296996	29298419	+	.
26	141373709	1	41373709	2.57e-09	0.0833333	228	0.243858	0.37341	0.000102234	MLw	141373709	1	41373709	gene_promotor	LOC_Os01g71410	glycosyl hydrolases family 17 putative expressed		41374129	41375254	+	.
83	303038118	3	3038118	7.39e-08	0.0701754	228	0.243858	0.348012	0.000891315	MLw	303038118	3	3038118	gene_promotor	LOC_Os03g06070	la domain containing protein putative expressed		3038732	3044372	+	.
40	303085463	3	3085463	5.99e-09	0.100877	228	0.243858	0.366931	0.00015272	MLw	303085463	3	3085463	gene_promotor	LOC_Os03g06139	ABC-2 type transporter domain containing protein expressed		3074915	3084985	-	.
65	322137477	3	22137477	3.58e-08	0.383772	228	0.243858	0.353419	0.000553369	MLw	322137477	3	22137477	gene_promotor	LOC_Os03g39790	retrotransposon protein putative unclassified expressed		22134308	22136723	-	.
95	322243685	3	22243685	8.92e-08	0.385965	228	0.243858	0.346621	0.00092425	MLw	322243685	3	22243685	gene_promotor	LOC_Os03g40040	expressed protein		22241694	22243156	-	.
98	322350576	3	22350576	9.04e-08	0.0570175	228	0.243858	0.346523	0.000926917	MLw	322350576	3	22350576	gene_promotor	LOC_Os03g40194	disease resistance RPP13-like protein 1 putative expressed		22346149	22350013	-	.
64	322440834	3	22440834	3.57e-08	0.0548246	228	0.243858	0.353439	0.000553369	MLw	322440834	3	22440834	gene_promotor	LOC_Os03g40390	expressed protein		22441762	22443610	+	.
107	322440834	3	22440834	5.9841e-08	0.0548246	228	0.309016	0.405619	0.00819227	MLs	322440834	3	22440834	gene_promotor	LOC_Os03g40390	expressed protein		22441762	22443610	+	.
44	322440893	3	22440893	1.26e-08	0.0701754	228	0.243858	0.361261	0.000292209	MLw	322440893	3	22440893	gene_promotor	LOC_Os03g40390	expressed protein		22441762	22443610	+	.
103	322440893	3	22440893	3.72537e-09	0.0701754	228	0.309016	0.424782	0.0012357	MLs	322440893	3	22440893	gene_promotor	LOC_Os03g40390	expressed protein		22441762	22443610	+	.
58	430137498	4	30137498	2.71e-08	0.149123	228	0.243858	0.355514	0.000464612	MLw	430137498	4	30137498	gene_promotor	LOC_Os04g51190	growth-regulating factor putative expressed		30132567	30136523	-	.
77	430384178	4	30384178	6.73e-08	0.100877	228	0.243858	0.348712	0.000880275	MLw	430384178	4	30384178	gene_promotor	LOC_Os04g51600	expressed protein		30384891	30386591	+	.
81	516046238	5	16046238	7.21e-08	0.0986842	228	0.243858	0.348192	0.000891315	MLw	516046238	5	16046238	gene_promotor	LOC_Os05g27650	transposon protein putative ACTA En/Spm sub-class		16035850	16045851	-	.
57	626583605	6	26583605	2.69e-08	0.372807	228	0.243858	0.355549	0.000464612	MLw	626583605	6	26583605	gene_promotor	LOC_Os06g44080	ubiquitin family protein putative expressed		26584563	26587135	+	.
66	626584500	6	26584500	3.61e-08	0.377193	228	0.243858	0.353346	0.000553369	MLw	626584500	6	26584500	gene_promotor	LOC_Os06g44080	ubiquitin family protein putative expressed		26584563	26587135	+	.
72	826013936	8	26013936	5.47e-08	0.0921053	228	0.243858	0.350246	0.000767342	MLw	826013936	8	26013936	gene_promotor	LOC_Os08g41180	MBTB31-Bric-a-Brac Tramtrack Broad Complex BTB domain with Meprin and TRAF Homology MATH domain expressed		26012378	26013598	-	.
7	906325676	9	6325676	3.47e-11	0.379386	228	0.243858	0.407234	5.75e-06	MLw	906325676	9	6325676	gene_promotor	LOC_Os09g11380	conserved hypothetical protein		6326584	6335208	+	.
27	906759629	9	6759629	2.96e-09	0.0789474	228	0.243858	0.372328	0.000109469	MLw	906759629	9	6759629	gene_promotor	LOC_Os09g12000	hypothetical protein		6758298	6759348	-	.
49	916588485	9	16588485	1.84e-08	0.0767544	228	0.243858	0.358402	0.00037791	MLw	916588485	9	16588485	gene_promotor	LOC_Os09g27280	hypothetical protein		16587442	16587808	-	.
96	322267345	3	22267345	8.92e-08	0.385965	228	0.243858	0.346621	0.00092425	MLw	322267345	3	22267345	CDS	LOC_Os03g40084	hypothetical protein	LOC_Os03g40084.1	22267316	22267429	+	0	T	T	GAT	D	C	GAC	D	synonymous_mutation
78	516365330	5	16365330	6.97e-08	0.274123	228	0.243858	0.348447	0.000880275	MLw	516365330	5	16365330	CDS	LOC_Os05g28090	expressed protein	LOC_Os05g28090.2	16365315	16365410	-	0	T	T	GGT	G	C	GGC	G	synonymous_mutation
61	906326601	9	6326601	3.1e-08	0.399123	228	0.243858	0.354498	0.000514027	MLw	906326601	9	6326601	CDS	LOC_Os09g11380	conserved hypothetical protein	LOC_Os09g11380.1	6326584	6326774	+	0	T	T	ATT	I	C	ATC	I	synonymous_mutation
92	125296113	1	25296113	8.62e-08	0.0570175	228	0.243858	0.346871	0.00092425	MLw	125296113	1	25296113	intron	LOC_Os01g44130	aspartic proteinase oryzasin-1 precursor putative expressed		25290294	25297028	+	.
16	408882543	4	8882543	4.21e-10	0.0679825	228	0.243858	0.387436	2.8e-05	MLw	408882543	4	8882543	intron	LOC_Os04g16350	retrotransposon protein putative unclassified		8881136	8884240	-	.
3	409772335	4	9772335	1.65e-11	0.0526316	228	0.243858	0.413213	4.23e-06	MLw	409772335	4	9772335	intron	LOC_Os04g17840	retrotransposon protein putative unclassified		9772029	9777537	-	.
69	411090633	4	11090633	4.84e-08	0.0526316	228	0.243858	0.351163	0.000708467	MLw	411090633	4	11090633	intron	LOC_Os04g19900	retrotransposon protein putative Ty3-gypsy subclass		11086794	11091649	+	.
75	430248474	4	30248474	6.16e-08	0.423246	228	0.243858	0.349363	0.000828842	MLw	430248474	4	30248474	intron	LOC_Os04g51390	aldose 1-epimerase putative expressed		30248076	30253241	+	.
28	516086208	5	16086208	2.97e-09	0.0723684	228	0.243858	0.372293	0.000109469	MLw	516086208	5	16086208	intron	LOC_Os05g27720	transposon protein putativeACTA En FSpm sub-class		16083677	16088421	-	.
39	516087024	5	16087024	5.88e-09	0.0745614	228	0.243858	0.367068	0.00015272	MLw	516087024	5	16087024	intron	LOC_Os05g27720	transposon protein putativeACTA En FSpm sub-class		16083677	16088421	-	.
42	516101427	5	16101427	1.08e-08	0.111842	228	0.243858	0.362411	0.000263295	MLw	516101427	5	16101427	intron	LOC_Os05g27740	hypothetical protein		16098911	16102144	-	.
79	516127316	5	16127316	6.97e-08	0.223684	228	0.243858	0.348447	0.000880275	MLw	516127316	5	16127316	intron	LOC_Os05g27790	membrane associated DUF588 domain containing protein putative expressed		16126601	16129297	-	.
10	516128832	5	16128832	1.03e-10	0.0964912	228	0.243858	0.398574	1.04e-05	MLw	516128832	5	16128832	intron	LOC_Os05g27790	membrane associated DUF588 domain containing protein putative expressed		16126601	16129297	-	.
46	523137759	5	23137759	1.67e-08	0.394737	228	0.243858	0.359152	0.000367167	MLw	523137759	5	23137759	intron	LOC_Os05g39530	ribonuclease P family protein putative expressed		23133575	23138906	-	.
5	523138240	5	23138240	2.13e-11	0.394737	228	0.243858	0.411165	4.23e-06	MLw	523138240	5	23138240	intron	LOC_Os05g39530	ribonuclease P family protein putative expressed		23133575	23138906	-	.
6	523138248	5	23138248	2.13e-11	0.394737	228	0.243858	0.411165	4.23e-06	MLw	523138248	5	23138248	intron	LOC_Os05g39530	ribonuclease P family protein putative expressed		23133575	23138906	-	.
23	626309880	6	26309880	1.49e-09	0.0570175	228	0.243858	0.377609	6.74e-05	MLw	626309880	6	26309880	intron	LOC_Os06g43690	WD repeat-containing protein putative expressed		26302840	26311415	+	.
18	906326783	9	6326783	4.84e-10	0.385965	228	0.243858	0.386356	2.83e-05	MLw	906326783	9	6326783	intron	LOC_Os09g11380	conserved hypothetical protein		6326584	6335208	+	.
37	906326866	9	6326866	5.32e-09	0.407895	228	0.243858	0.367826	0.000147136	MLw	906326866	9	6326866	intron	LOC_Os09g11380	conserved hypothetical protein		6326584	6335208	+	.
102	1010502493	10	10502493	2.30002e-09	0.0745614	228	0.309016	0.428166	0.00114437	MLs	1010502493	10	10502493	intron	LOC_Os10g20860	protease inhibitor/seed storage/LTP family putative		10499697	10502810	-	.
60	104194088	1	4194088	2.94e-08	0.114035	228	0.243858	0.354891	0.000496058	MLw	104194088	1	4194088	intergenic				4190716	4195936
82	104202117	1	4202117	7.29e-08	0.127193	228	0.243858	0.34812	0.000891315	MLw	104202117	1	4202117	intergenic				4200317	4207552
74	115354359	1	15354359	6.13e-08	0.364035	228	0.243858	0.3494	0.000828842	MLw	115354359	1	15354359	intergenic				15353354	15355752
53	118058531	1	18058531	2.11e-08	0.375	228	0.243858	0.357376	0.000404351	MLw	118058531	1	18058531	intergenic				18053894	18061399
89	129265318	1	29265318	8.04e-08	0.0921053	228	0.243858	0.347389	0.000899123	MLw	129265318	1	29265318	intergenic				29249068	29270112
59	129265667	1	29265667	2.71e-08	0.0877193	228	0.243858	0.355511	0.000464612	MLw	129265667	1	29265667	intergenic				29249068	29270112
51	129267973	1	29267973	2.02e-08	0.0877193	228	0.243858	0.357721	0.000401655	MLw	129267973	1	29267973	intergenic				29249068	29270112
56	129272410	1	29272410	2.64e-08	0.0877193	228	0.243858	0.355714	0.000464612	MLw	129272410	1	29272410	intergenic				29272226	29276441
32	129295029	1	29295029	4.51e-09	0.0701754	228	0.243858	0.369098	0.000131896	MLw	129295029	1	29295029	intergenic				29294398	29296995
35	129304267	1	29304267	4.51e-09	0.0701754	228	0.243858	0.369098	0.000131896	MLw	129304267	1	29304267	intergenic				29301386	29305402
50	310440350	3	10440350	1.86e-08	0.0679825	228	0.243858	0.358333	0.00037791	MLw	310440350	3	10440350	intergenic				10439419	10442167
19	315010911	3	15010911	6.29e-10	0.0526316	228	0.243858	0.384311	3.48e-05	MLw	315010911	3	15010911	intergenic				15010384	15014452
2	315682836	3	15682836	4.15e-12	0.0504386	228	0.243858	0.424445	4.13e-06	MLw	315682836	3	15682836	intergenic				15681562	15684188
105	315682836	3	15682836	3.20849e-08	0.0504386	228	0.309016	0.409873	0.00638548	MLs	315682836	3	15682836	intergenic				15681562	15684188
88	322105576	3	22105576	7.86e-08	0.407895	228	0.243858	0.347558	0.000898795	MLw	322105576	3	22105576	intergenic				22103618	22108924
97	322293625	3	22293625	8.92e-08	0.385965	228	0.243858	0.346621	0.00092425	MLw	322293625	3	22293625	intergenic				22291070	22293877
86	322293690	3	22293690	7.67e-08	0.394737	228	0.243858	0.347735	0.000897547	MLw	322293690	3	22293690	intergenic				22291070	22293877
13	322304180	3	22304180	1.26e-10	0.381579	228	0.243858	0.396937	1.05e-05	MLw	322304180	3	22304180	intergenic				22298640	22308875
21	322338359	3	22338359	8.58e-10	0.304825	228	0.243858	0.38189	4.27e-05	MLw	322338359	3	22338359	intergenic				22336814	22346148
48	322403064	3	22403064	1.83e-08	0.0657895	228	0.243858	0.358448	0.00037791	MLw	322403064	3	22403064	intergenic				22401654	22412045
104	322403064	3	22403064	2.16093e-08	0.0657895	228	0.309016	0.412585	0.00537581	MLs	322403064	3	22403064	intergenic				22401654	22412045
9	322486268	3	22486268	8.9e-11	0.403509	228	0.243858	0.399708	1.04e-05	MLw	322486268	3	22486268	intergenic				22476620	22492711
106	322486268	3	22486268	4.18871e-08	0.403509	228	0.309016	0.40805	0.00694693	MLs	322486268	3	22486268	intergenic				22476620	22492711
20	322491183	3	22491183	7.89e-10	0.399123	228	0.243858	0.382537	4.13e-05	MLw	322491183	3	22491183	intergenic				22476620	22492711
68	322528344	3	22528344	4.56e-08	0.440789	228	0.243858	0.351605	0.000677683	MLw	322528344	3	22528344	intergenic				22520691	22530778
30	322529454	3	22529454	4.17e-09	0.407895	228	0.243858	0.3697	0.000131896	MLw	322529454	3	22529454	intergenic				22520691	22530778
29	413659408	4	13659408	3.89e-09	0.390351	228	0.243858	0.370222	0.000131896	MLw	413659408	4	13659408	intergenic				13652816	13663423
63	430240597	4	30240597	3.29e-08	0.142544	228	0.243858	0.354052	0.000527985	MLw	430240597	4	30240597	intergenic				30239026	30243064
71	430269102	4	30269102	5.44e-08	0.151316	228	0.243858	0.350298	0.000767342	MLw	430269102	4	30269102	intergenic				30266267	30269343
91	435220819	4	35220819	8.32e-08	0.0614035	228	0.243858	0.347131	0.000920281	MLw	435220819	4	35220819	intergenic				35220432	35228122
93	515116638	5	15116638	8.69e-08	0.149123	228	0.243858	0.346812	0.00092425	MLw	515116638	5	15116638	intergenic				15115579	15118885
84	515845966	5	15845966	7.49e-08	0.210526	228	0.243858	0.347911	0.000891315	MLw	515845966	5	15845966	intergenic				15838928	15851277
90	516135265	5	16135265	8.04e-08	0.221491	228	0.243858	0.347387	0.000899123	MLw	516135265	5	16135265	intergenic				16129298	16145248
15	516168404	5	16168404	2.93e-10	0.100877	228	0.243858	0.390279	2.08e-05	MLw	516168404	5	16168404	intergenic				16162623	16170220
62	516209696	5	16209696	3.28e-08	0.394737	228	0.243858	0.354073	0.000527985	MLw	516209696	5	16209696	intergenic				16207594	16209897
17	516324498	5	16324498	4.7e-10	0.0942982	228	0.243858	0.386589	2.83e-05	MLw	516324498	5	16324498	intergenic				16306494	16335333
80	522192885	5	22192885	6.99e-08	0.414474	228	0.243858	0.348429	0.000880275	MLw	522192885	5	22192885	intergenic				22188069	22200472
25	615693545	6	15693545	2.34e-09	0.0526316	228	0.243858	0.374113	9.72e-05	MLw	615693545	6	15693545	intergenic				15688567	15694777
36	624662772	6	24662772	5.02e-09	0.0701754	228	0.243858	0.368275	0.000142706	MLw	624662772	6	24662772	intergenic				24655125	24667965
4	626508017	6	26508017	1.87e-11	0.0701754	228	0.243858	0.412185	4.23e-06	MLw	626508017	6	26508017	intergenic				26500170	26508921
101	626508017	6	26508017	7.11656e-10	0.0701754	228	0.309016	0.436466	0.000708164	MLs	626508017	6	26508017	intergenic				26500170	26508921
54	626583018	6	26583018	2.19e-08	0.372807	228	0.243858	0.357107	0.000411178	MLw	626583018	6	26583018	intergenic				26582752	26584562
12	626588441	6	26588441	1.16e-10	0.0745614	228	0.243858	0.397635	1.04e-05	MLw	626588441	6	26588441	intergenic				26587136	26588784
38	900720828	9	720828	5.72e-09	0.403509	228	0.243858	0.367274	0.00015272	MLw	900720828	9	720828	intergenic				709945	730982
22	900822793	9	822793	1.43e-09	0.0592105	228	0.243858	0.377909	6.74e-05	MLw	900822793	9	822793	intergenic				821771	843146
94	900834502	9	834502	8.89e-08	0.392544	228	0.243858	0.346646	0.00092425	MLw	900834502	9	834502	intergenic				821771	843146
47	906277978	9	6277978	1.7e-08	0.346491	228	0.243858	0.359027	0.000367167	MLw	906277978	9	6277978	intergenic				6276323	6284003
31	906278538	9	6278538	4.22e-09	0.350877	228	0.243858	0.369599	0.000131896	MLw	906278538	9	6278538	intergenic				6276323	6284003
11	906279395	9	6279395	1.14e-10	0.375	228	0.243858	0.397747	1.04e-05	MLw	906279395	9	6279395	intergenic				6276323	6284003
73	906323140	9	6323140	5.99e-08	0.434211	228	0.243858	0.349573	0.000828215	MLw	906323140	9	6323140	intergenic				6322797	6326583
76	906323355	9	6323355	6.53e-08	0.434211	228	0.243858	0.348938	0.000865854	MLw	906323355	9	6323355	intergenic				6322797	6326583
45	915099731	9	15099731	1.45e-08	0.133772	228	0.243858	0.36024	0.000326856	MLw	915099731	9	15099731	intergenic				15096844	15100740
70	1016259717	10	16259717	4.99e-08	0.317982	228	0.243858	0.350935	0.00071982	MLw	1016259717	10	16259717	intergenic				16255987	16265017
85	1021052914	10	21052914	7.52e-08	0.0921053	228	0.243858	0.347881	0.000891315	MLw	1021052914	10	21052914	intergenic				21051097	21054680
99	1102659922	11	2659922	9.38e-08	0.33114	228	0.243858	0.346242	0.00095181	MLw	1102659922	11	2659922	intergenic				2656404	2661117
100	1104035139	11	4035139	9.6e-08	0.0964912	228	0.243858	0.346073	0.00095181	MLw	1104035139	11	4035139	intergenic				4029947	4039418

## Sheet: Sheet3
				MLw	MLs
			Total	99	7
			Intergenic	52	4
			Intron	16	1
			Gene promotor	24	2
			CDS synonymous	3
			CDS nonsynonymous	3
			5' UTR	1
